# Supplementary material
Source: Research Square preprint supplement (doi:10.21203/rs.3.rs-7351160/v1)
Supplement: Supplementary file 1 [file 2f54b4acef761ce20c0fd884.docx]

**Informed Consent Form**

**Information Page**

Dear Patient,

You have been diagnosed with **Functional Constipation**. We are inviting you to participate in a study titled “Efficacy and Mechanism of acupuncture at Baliao acupoint for Functional Constipation”. This study is supported by “the Central Government’s Clinical Research Fund for High-Level TCM Hospitals,” (project number, HLCMHPP202331). The study protocol has been reviewed and approved by the Ethics Committee of Guang’anmen Hospital, China Academy of Chinese Medical Sciences, for clinical research.

Before you decide whether to participate in this study, please read the following information carefully. It will help you understand the purpose of the study, the procedures and duration, potential benefits, risks, and discomforts associated with participation. You are also welcome to discuss with your family and friends or seek clarification from your doctor to help you make an informed decision.

**1. Study Background and Objectives**

**1.1 Disease Burden and Current Treatment Status**

Constipation is one of the most common gastrointestinal disorders, characterized by difficult bowel movements and/or reduced frequency of bowel movements, with hard stools. Reduced frequency of bowel movements is defined as fewer than three bowel movements per week. Chronic constipation is diagnosed when the condition persists for at least six months. Globally, the prevalence of constipation is 15%. With the improvement of living standards, increased work and life stress, and the aging population in China, the incidence of chronic constipation is gradually increasing, with a total prevalence of 8.5% in China. Among individuals with chronic constipation, the majority suffer from Functional Constipation (FC). FC is defined as a motility disorder, stress-related disease, or psychosomatic disease. Numerous studies have shown that anxiety is an independent predictor of new-onset functional gastrointestinal diseases. Therefore, brain-gut interaction is significant in the pathogenesis of functional constipation. Currently, there is no treatment targeting the “brain-gut axis.” Existing treatments, such as laxatives, biofeedback therapy, and colectomy, focus on single targets and have several drawbacks, including insignificant efficacy, high recurrence rates after discontinuation, drug dependence, and poor long-term outcomes. Thus, there is an urgent need to explore new treatment methods for functional constipation.

**1.2 Objectives of This Study**

To investigate the therapeutic effect of acupuncture at the Baliao acupoints on functional constipation.

To explore the possible mechanisms underlying the treatment of functional constipation with acupuncture at Baliao acupoint.

**1.3 Study Sites and Estimated Number of Participants**

This study estimated to enroll a total of 168 participants in three tertiary-A hospitals in China, which are Guang'anmen Hospital of China Academy of Chinese Medical Sciences, Affiliated Hospital of Nanjing University of Chinese Medicine, and Xiyuan Hospital of China Academy of Chinese Medical Sciences.

**2. Who Should Not Participate in the Study?**

Individuals with organic constipation, drug-induced constipation, systemic constipation; those with contraindications to MRI, such as metallic foreign bodies in the head or pacemakers; left-handed individuals; those with communication barriers or unwillingness to cooperate with treatment; and pregnant women are not eligible to participate in this study.

**3. What Will Be Required If You Participate?**

Before you are enrolled in the study, the doctor will ask about and record your medical history and assess your condition. If you meet the inclusion criteria and voluntarily decide to participate in the study, you will be asked to sign the informed consent form. Your decision not to participate will not lead to any bias or affect your medical care.

If you voluntarily participate in the study, the following procedures will be followed:

- **Duration:** The study is expected to last for 10 weeks, including 2 weeks for baseline data collection, 4 weeks of treatment, and 4 weeks of follow-up.
- **Randomization:** You will be randomly assigned to acupuncture group or sham-acupuncture grouop.
- **Interventions:**
- The **acupuncture group** will receive acupuncture at Baliao acupoints five times per week for a total of four weeks, with each session lasting 30 minutes. Baliao acupoints are consist of Shangliao (BL31), Ciliao (BL32), Zhongliao (BL33), Xialiao (BL34). The first to fourth pairs of posterior sacral foramina correspond to the Shangliao (BL31), Ciliao (BL32), Zhongliao (BL33), Xialiao (BL34) acupoints, respectively.
- The **sham-acupuncture group** will receive shallow needling at sham Baliao acupoints. sham Baliao acupoints is located 5mm away from the surface projections of the first, second, third and forth pairs of sacral foramina.
- **Emergency Management**: If you experience no bowel movements for three consecutive days or severe discomfort due to inability to defecate during the treatment period, emergency measures can be taken, such as oral administration of lactulose solution (15 mL each time) or glycerin enema. You must record the dosage and frequency of medication.
- During study period, you are not allowed to use other medications for constipation, such as rhubarb, senna leaves, sodium nitrate, Tongbian Oral Liquid, etc.
- **Observation Indicators:** Before the study begins, the physician will collect your general information, medical history, symptoms, and physical signs. **After enrollment**, you will be required to complete heart rate variability (HRV) testing, brain functional MRI. Under the guidance of the physician, you will also complete self-assessment questionnaires for constipation patients, quality of life questionnaires for constipation patients, anxiety self-rating scales, and depression self-rating scales. **After the intervention**, you will need to keep a bowel movement diary and complete HRV testing, and the aforementioned questionnaires at week 2, 4, 6, and 8 (a total of 5 times during the study period). A brain functional MRI and HRV test will be conducted at the end of week 4.
- **Study Termination:** If you develop an infection or allergy at the needling site, or if you do not follow the treatment plan and cooperate with follow-ups, your participation in the study will be terminated.

During the study, new information regarding the research methods may emerge. If this occurs, your study physician will promptly inform you and discuss with you whether you still wish to continue participating in the study. If you decide to continue, you may be asked to sign a new informed consent form. During the follow-up phase, the physician may contact you via phone or outpatient follow-up to check on your condition.

**4. Potential Benefits of Participation**

Participating in this study may allow for timely assessment of your condition and guide subsequent treatment, although no guarantees can be made. You will not receive any direct financial benefits from this study.

**5. Potential Adverse Reactions, Risks, Discomforts, and Inconveniences**

The anticipated adverse events in this study include, but are not limited to, local infection, hematoma, allergy, needle-related events (such as fainting, bending, or breaking of the needle), electrolyte disturbances, cardiovascular adverse events caused by difficult bowel movements, and intestinal obstruction due to constipation. If you experience unbearable pain, oral analgesic medication may be administered for symptomatic relief. In case of cardiovascular adverse events caused by difficult bowel movements, you should seek emergency care and consult with specialists in cardiology, neurology, and interventional medicine. For intestinal obstruction caused by constipation, measures such as glycerin enema, analgesia, antispasmodics, rectal tube decompression, and anti - infection therapy may be taken, and surgical intervention may be necessary in severe cases.

If you experience any adverse reactions related to this study during the study period, please contact Dr. Wei, the study team contact person, at Department of Anorectal Surgery, Floor 9, Building 6, Guang’anmen Hospital, China Academy of Chinese Medical Sciences, phone number: 010 - 88001025.

If you have any complaints during the study, you may contact the Ethics Committee of Guang’anmen Hospital, China Academy of Chinese Medical Sciences, at telephone number: 010-88001152.

**6. Costs and Compensation**

The costs of acupuncture, sham-acupuncture, brain functional MRI, HRV testing, and questionnaire assessments related to this study will be covered by the research team. The cost of oral medications will be paid according to the outpatient or inpatient process. The research team will also cover the costs for data collection and analysis.

During the study, physicians will make every effort to prevent and treat any harm that may arise from this study. If an adverse event occurs during the clinical research, a medical expert committee will determine whether it is related to the study. Guang’anmen Hospital, China Academy of Chinese Medical Sciences, will provide corresponding treatment costs and compensation for damages related to the study in accordance with relevant regulations.

**7. Confidentiality of Personal Information**

Any personal information and data obtained about you during the study will be strictly confidential. Your clinical data will be identified by a study number/code rather than your name. Information that can identify you will not be disclosed to anyone outside the research team. Any public reports regarding the results of this study will not disclose your personal identity. We will make every effort to protect the privacy of your personal medical information within the scope permitted by law.

In accordance with medical research ethics, study data, excluding personal privacy information, will be available for public access and sharing. Access and sharing will be limited to electronic databases based on the internet. The data may be reused based on thorough assessment, proper planning, and standardized implementation, ensuring that no personal privacy information is leaked.

**8. How Can You Obtain More Information?**

You may ask any questions about this study at any time and receive corresponding answers. If there is any important new information during the study that may affect your willingness to continue participating, your doctor will notify you promptly. Your study results will be reported to you by the principal investigator after the study ends.

**9. Voluntary Participation and Withdrawal**

Your participation in this study is entirely voluntary. You have the right to refuse to participate in this study or to withdraw from the study at any time during the study period. This will not affect your relationship with your doctor or result in any loss of medical care or other benefits to which you are otherwise entitled. If you decide not to participate in this study, you may choose the following treatment options for constipation: oral lactulose, polyethylene glycol electrolyte solution, prokinetic drugs, stimulant laxatives, traditional Chinese medicine, and other conservative treatments. You may also choose sacral nerve stimulation, biofeedback therapy, or surgical intervention if necessary.

For your best interest, the doctor or researcher may terminate your participation in this study at any time during the study period.

**10. What Should You Do Now?**

The decision to participate in this study is up to you (and your family). Before you make the decision to participate, please ask your doctor any questions you may have.

Thank you for reading the above information. If you decide to participate in this study, please inform your doctor, who will arrange all matters related to the study for you. Please keep this document for your records.

**Consent Signature Page**

Project Name: Efficacy and Mechanism of acupuncture at Baliao acupoint for Functional Constipation

Principal Investigator Unit: Guang’anmen Hospital, China Academy of Chinese Medical Sciences

Collaborating Units: Xiyuan Hospital, China Academy of Chinese Medical Sciences; Affiliated Hospital of Nanjing University of Chinese Medicine

Project Number: 20240601-1

**Statement of Consent**

I have read the information provided about this study and have had the opportunity to discuss it with the doctor and ask questions. All my questions have been answered to my satisfaction.

I understand the potential risks and benefits associated with participating in this study. I am aware that my participation is voluntary, and I confirm that I have had sufficient time to consider this and understand that:

• I can ask the doctor for more information at any time.

• I can withdraw from the study at any time without discrimination or retaliation, and my medical care and rights will not be affected.

I also understand that if I withdraw from the study, especially if it is due to medication, informing the doctor of any changes in my condition and completing the required physical and laboratory examinations will be very beneficial to the study.

If my condition changes and I need to take any other medications, I will consult the doctor beforehand or inform the doctor truthfully afterward.

I will receive a copy of the signed and dated informed consent form.

Finally, I decide to agree to participate in this study and promise to follow the doctor’s instructions as much as possible.

Patient’s Signature: ___________________ Date: ____________________

Contact Number: ________________ __

I confirm that I have explained the details of this trial to the patient, including their rights and the potential benefits and risks, and have provided them with a copy of the signed informed consent form.

Patient’s Signature: ___________________ Date: ____________________

Doctor’s contact number: 010-88001025
